# Supplementary material for: Validating an inertial measurement unit for cricket fast bowling: a first step in assessing the feasibility of diagnosing back injury risk in cricket fast bowlers during a tele-sport-and-exercise medicine consultation
Source: PeerJ. 2022 Apr 7;10:e13228. doi: 10.7717/peerj.13228 (PMC8995020; doi:10.7717/peerj.13228)
Supplement: Supplemental Information 1 [file peerj-10-13228-s001.xlsx]

## Sheet: Sheet1
Participant	Over	Ball	Bowling Arm	Front Leg	Counter rotation to the left at front foot initial contact (FFIC)		Lateral flexion at FFIC		Knee flexion at FFIC
					Vicon	Noraxon Quartenion data	Vicon	Noraxon Quartenion data	Vicon	Noraxon Quartenion data	FFIC Frame
1	1	1	R	L	-28.03	-28.67	-3.52	-9.96	25.56	19.94	21073
1	1	2	R	L		25.84		5.2	21.15	15.62	29270
1	1	3	R	L	-24.31	-30.65	-0.54	-6.91	28.46	24.15	53319
1	1	4	R	L		22.21		5.54	17.34	13.89	61351
1	1	5	R	L	17.78	25.73	2.86	7.45	21.26	13.49	68876
1	2	6	R	L		19.26		7.6	5.26	5.79	6127
1	2	7	R	L		17.93		4.51	3.61	4.94	14353
1	2	8	R	L		18.53		8.94	13.11	12.87	22552
1	2	9	R	L		26.73		9.5	8.25	8.71	30260
1	2	10	R	L		25.69		3.4	8.27	8.77	38143
1	2	11	R	L			4.02	6.16	8.67	9.24	45830
1	3	12	R	L		26.23		7.76	5.17	5.65	6185
1	3	13	R	L		18.64		7.31	5.76	6.06	15809
1	3	14	R	L		24.75		6.29	14.19	12.63	25011
1	3	15	R	L		23.55		5.64	6.93	6.37	32864
1	3	16	R	L		23.81		5.78	7.64	5.17	41739
1	3	17	R	L		22.35		7.4	4.21	4.41	51779
1	4	18	R	L		23.31		3.68	4.16	4.03	5628
1	4	19	R	L		17.87		2.52			13246
1	4	20	R	L		19.74		7.07	4.75	3.56	21111
1	4	21	R	L		21.28		6.73	4.18	3.48	29735
1	4	22	R	L	17.97	22.26	-9.95	0.93	28.58	22.74	37719
1	4	23	R	L		21.62		4.6	5.01	5.49	45609
2	1	1	R	L	16.87	22.01	7.54	11.07	22.79	10.55	4886
2	1	2	R	L	17.02	19.79	7.93	11.51	15.35	4.49	11231
2	1	3	R	L	19.61	14.53	9.41	10.46	23.36	10.83	17481
2	1	4	R	L	12.69	12.57	10.11	9.9	19.86	7.58	23651
2	1	5	R	L	18.46	18.39	6.78	13.89	23.12	12.36	30158
2	1	6	R	L	16.58	12.85	6.13	9.59	16.39	6.86	55826
2	2	7	R	L	18.92	18.71	0.84	8.4	19.76	9.32	5223
2	2	8	R	L	15.7	18.28	6.93	12.68	21.06	11.01	12737
2	2	9	R	L	16.19	12.75	6.36	11.02	26.85	16.05	19959
2	2	10	R	L	18.09	19.35	8.3	15.39	29.11	15.3	26450
2	2	11	R	L	13.69	15.13	6.79	11.81	27.97	13.41	32778
2	2	12	R	L	19.99	20.72	4.41	12.4	32.59	15.32	39364
2	4	13	R	L	15.56	20.93	8.78	14.67	23.33	5.83	4778
2	4	14	R	L	20.35	25.66	5.88	14.07	26.49	12.94	11059
2	4	15	R	L	19.25	25.6	2.39	9.83	23.12	10.76	18083
2	4	16	R	L	15.67	19.49	4.45	10.92	25.35	12.37	24479
2	4	17	R	L	20.81	20.03	0.16	9.6	26.37	14.86	31096
2	4	18	R	L	17.56	21.85	0.06	8.25	28.07	17.57	37764
3	1	1	R	L	24.78	25.16	-9.49	1.49	22.08	32.99	3901
3	1	2	R	L	26.51	22.33	-12.77	-0.91	24.72	33.65	9589
3	1	3	R	L	23.53	27.02	-4.68	6.9	23.47	32.82	15253
3	1	4	R	L	16.2	19.21	-5.39	3.52	23.93	32.27	20782
3	1	5	R	L	25.15	22.31	-13.31	-5.58	25.98	31.41	26362
3	1	6	R	L	27.75	28.3	-6.65	2.01	20.86	30.09	32216
3	2	7	R	L	32.19	32.57	-14.31	-7.52	6.52	31.43	4161
3	2	8	R	L	25.32	28.02	-7.83	0.3	4.04	31.01	14352
3	2	9	R	L	28.84	30.23	-6.6	2.63	6.7	31.62	19889
3	2	10	R	L	27	28.13	-10.61	0.57	4.16	33.89	25867
3	2	11	R	L	26.16	25.68	-14.64	-5.64	24.65	34.03	32283
3	2	12	R	L	29.18	30.41	-9.63	0.79	17.21	27.16	38027
3	3	13	R	L	28.71	23.53	-8.01	0.88	28.81	33.09	4392
3	3	14	R	L	31.84	36.96	-3.82	-2.06			10969
3	3	15	R	L	22.71	24.23	-7.66	-3.33	0	28.33	17926
3	3	16	R	L	40.85	31.25	-10.56	-6.15			23223
3	3	17	R	L	28.39	27.46	-10.93	-8.53	0	29.24	28653
3	3	18	R	L		27.29		-4.85			34180
4	1	1	R	L	9.27	-5.62	2.61	1.39	15.84	40.65	4505
4	1	2	R	L	8.97	-14.02	7.01	-1.45	14.79	14.26	10472
4	1	3	R	L			6.65	-9.7	13.88	34.15	16736
4	1	4	R	L			5.58	1.34	16.99	24.72	23139
4	1	5	R	L	16.46	0.65	3.46	-2.38	8.06	22.69	30157
4	1	6	R	L	8.01	-4.47	8.39	0.51	14.25	13.39	36876
4	2	7	R	L			3.88	3.59	12.26	3.61	4973
4	2	8	R	L	14.97	-6.84	2.54	-3.75	10.7	6.59	11876
4	2	9	R	L	10.96	-5	6.02	-0.43	12.86	8.39	18391
4	2	10	R	L	14.08	-4.6	4.46	-0.55	13.05	1.47	25845
4	2	11	R	L			3.73	6.47	10.84	-0.58	32836
4	2	12	R	L	11.86	-6.69	3.58	1.71	15.83	1.34	39716
4	3	13	R	L			1.04	3.89	15.01	10.11	5217
4	3	14	R	L			1.65	-2.43		-4.35	11972
4	3	15	R	L	15.11	-5.01	4.78	6.04	12.01	-0.53	28633
4	3	16	R	L	14.78	-1.92	2.44	0.36	11.86	2.67	35041
4	3	17	R	L	18.35	2.14	3.36	3.84	7.4	13.32	41674
4	3	18	R	L	12.29	0	5.84	0	13.31	0	48317
4	3	19	R	L	16.56	0	5.47	0	12.64	0	54840
4	4	20	R	L	8.71	24.59	25.94	3.09		13.91	5109
4	4	21	R	L	12.61	22.61	4.94	2.94	14.35	10.48	20133
4	4	22	R	L		27.43		3.69	8.63	15.64	26109
4	4	23	R	L	9.85	20.84	6.26	4.97	9.69	14.29	40202
4	4	24	R	L	14.77	23.53	0.77	0.07	9.69	17.35	45933
5	1	1	R	L	19.78	22.94	-2.4	8.52	13.71	13.77	4354
5	1	2	R	L	22.68	25.88	-2.26	9.94	15.47	14.66	9857
5	1	3	R	L	22.44	26.13	-2.14	8.89	13.41	12.14	15387
5	1	4	R	L	21.29	26.01	-4.25	5.78	13.98	13.46	20491
5	1	5	R	L	22.01	27.84	-0.58	8.96	14.39	13.26	25709
5	1	6	R	L	22.54	27.53	-4.57	4.75	16.27	15.32	31285
5	2	7	R	L	22.55	26.58	-3.61	8.49	14.79	14.8	3680
5	2	8	R	L	22.88	28.16	-3.78	6.82	18.04	15.81	9555
5	2	9	R	L	22.83	27.71	-1.64	9.46	14.76	11.86	14354
6	1	1	L	R	-0.42	-5.5	9.6	2.26			5985
6	1	2	L	R	-0.04	-5.94	9.54	2.97			13269
6	1	3	L	R	2.36	-6.3	9.49	4.3			20616
6	1	4	L	R	-0.46	-9.51	9.56	5.17			27966
6	2	5	L	R	-1.65	-13.22	9.49	5.95	-1.36	3.54	5889
6	2	6	L	R	2.51	-4.93	10.72	8.25	-5.4	-0.46	13210
6	2	7	L	R	2.58	-1.97	9.54	11	-6.99	0.52	20577
6	2	8	L	R	2.12	-4.09	10.88	8.89	-5.28	0.16	28047
6	2	9	L	R	1.81	-5.38	9.23	6.47	-7.83	-1.52	35509
6	2	10	L	R	2.68	-3.77	9.89	8.94	-5.56	-0.77	42798
6	3	11	L	R	0.02	-4.53	9.73	6.73	-5.97	2.7	6075
6	3	12	L	R	1.68	-1.48	11.98	7.7	-4.74	3.68	13249
6	3	13	L	R	1.61	-6.1	9.47	5.33	-5.31	0.16	20786
6	3	14	L	R	1.02	-9.33	11.14	4.67	-1.06	1.31	28285
6	3	15	L	R	1.28	-6.76	8.96	4.84	-5.29	-2.25	35793
6	3	16	L	R	1.35	-7.32	8.66	5.22	-7.71	-3.23	43285
6	4	17	L	R	2.97	-0.51	11.96	9.33	-5.44	3.74	6041
6	4	18	L	R	0.34	-9.43	8.49	3.46	-4.87	3.26	13155
6	4	19	L	R	0.72	-8.94	9.69	5.19	-4.08	1.61	20533
6	4	20	L	R	3.16	-7.28	11.08	4.63	-5.51	-0.04	27791
6	4	21	L	R	2.42	-8.72	8.84	3.02	-6.92	-0.95	35181
6	4	22	L	R	-1.58	-13.99	9.83	-0.57	-1.17	-0.95	42811
7	2	1	L	R	-25.42	-41.36	11.97	-14.43	3.77	9.6	5725
7	2	2	L	R	-27.13	-47.37	11.56	-15.89	1.94	8.9	17032
7	2	3	L	R	-27.47	-51.69			0.74	7.75	25601
7	2	4	L	R	-24.74	-34.89			-1.33	8.28	33523
7	2	5	L	R	-27.18	-32.49			3.32	10.21	41450
7	2	6	L	R	-24.58	-34.85			1.12	9.55	62584
7	3	7	L	R	-26.27	-40.76	17.93	-8.85	0.08	10.82	5901
7	3	8	L	R	-27.27	-37.04			3.56	12.99	13227
7	3	9	L	R	-24.98	-36.32	11.66	-16.39	0.24	5.92	20597
7	3	10	L	R	-26.23	-44.73	13.76	-15.68	0.3	6.12	28228
7	3	11	L	R			13.25	-12.75	-1.04	7.28	35837
7	3	12	L	R					-0.17	7.27	43917
7	4	13	L	R					4.67	15.5	5834
7	4	14	L	R					4.41	13.08	14059
7	4	15	L	R	-26.65	-38.53	11.51	-15.55	0.95	8.59	22049
7	4	16	L	R	-22.46	-42.51	16.7	3.89	-0.55	7.5	48280
7	4	17	L	R	-25.87	-39.57	13.21	-3.49	2.97	13.88	68814
7	4	18	L	R	-26.27	-40.58	12.87	-1.31	1.09	12.08	77044
8	1	1	R	L	11.32	11.84	-11.66	3.56	32.54	34.56	10593
8	1	2	R	L	10.14	3.36	-10.47	5.67	28.22	31.9	16545
8	1	3	R	L	13.89	6.73	-12.1	4.05	28.24	30.25	22172
8	2	4	R	L			-19.77	-8.77	42.61	22.69	11036
8	3	5	R	L	13.84	14.79	-10.68	10.47	23.52	30.95	23863
8	4	6	R	L	6.46	-0.34	-6.84	16.04	29.1	31.87	17514
